# Supplementary material for: Preparation of multi-colored carbon dots via pH-controlled degradation of wheat bran/ o -phenylenediamine for Fe 3+ ion detection
Source: Royal Society of Chemistry journal article supplement (doi:10.1039/d4ra09117e), 2025-01-01
Supplement: d4ra09117e1.pdf [file d4ra09117e1.pdf]

**Preparation of multi-colored carbon dots via pH-Controlled degradation of wheat bran/ o-phenylenediamine for Fe<sup>3+</sup> ion detection**

Wen Xuan Zheng <sup>a,c</sup>, Tian Xiang Li <sup>a,c</sup>, Yu-hui, Xie <sup>a,c</sup>, Ya Dong Lv <sup>b, \*</sup>, De Long Xie<sup>\*,a,c</sup>,  
Feng Wu<sup>\*, a,c</sup>

<sup>a</sup> Yunnan Provincial Key Laboratory of Energy Saving in Phosphorus Chemical Engineering and New Phosphorus Materials, The Higher Educational Key Laboratory for Phosphorus Chemical Engineering of Yunnan Province, Faculty of Chemical Engineering, Kunming University of Science and Technology, Yunnan, China 650500

<sup>b</sup> Collage of Polymer Science and Engineering, Sichuan University, Sichuan, China, 610000

<sup>c</sup> The International Joint Laboratory for Sustainable Polymers of Yunnan Province, Engineering Research Center of Biodegradable Polymers, Educational Commission of Yunnan Province, Kunming, Yunnan, China 650500

Corresponding Authors: E-mail: [fengwu@kust.edu.cn](mailto:fengwu@kust.edu.cn) (F.W) ; [cedlxie@kust.edu.cn](mailto:cedlxie@kust.edu.cn) (DL.X) ; [yadonglv@scu.edu.cn](mailto:yadonglv@scu.edu.cn) (YD. L)

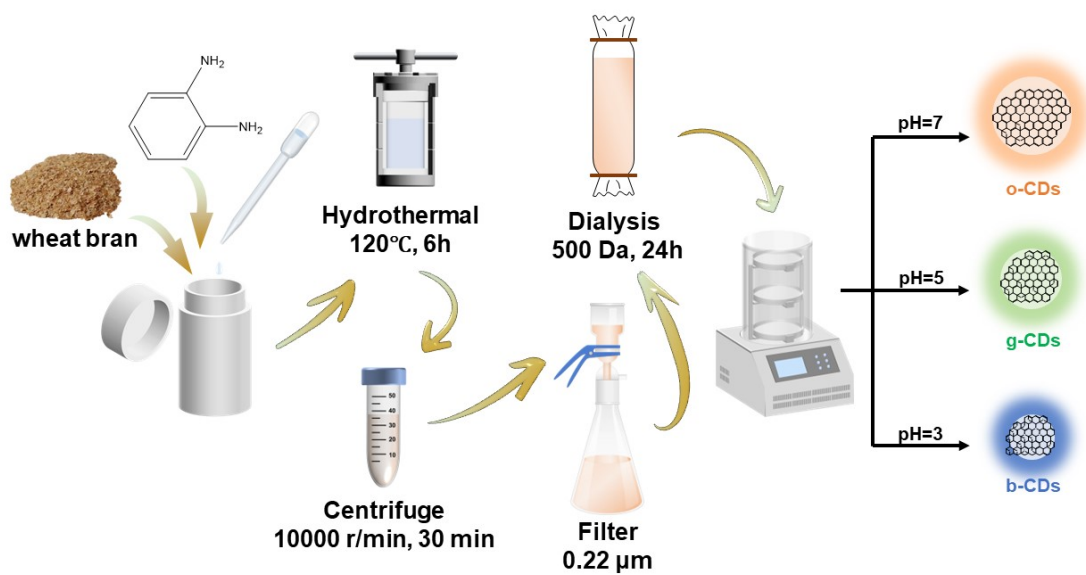

**Figure S1** The schematic of the preparation of multi-colored carbon dots

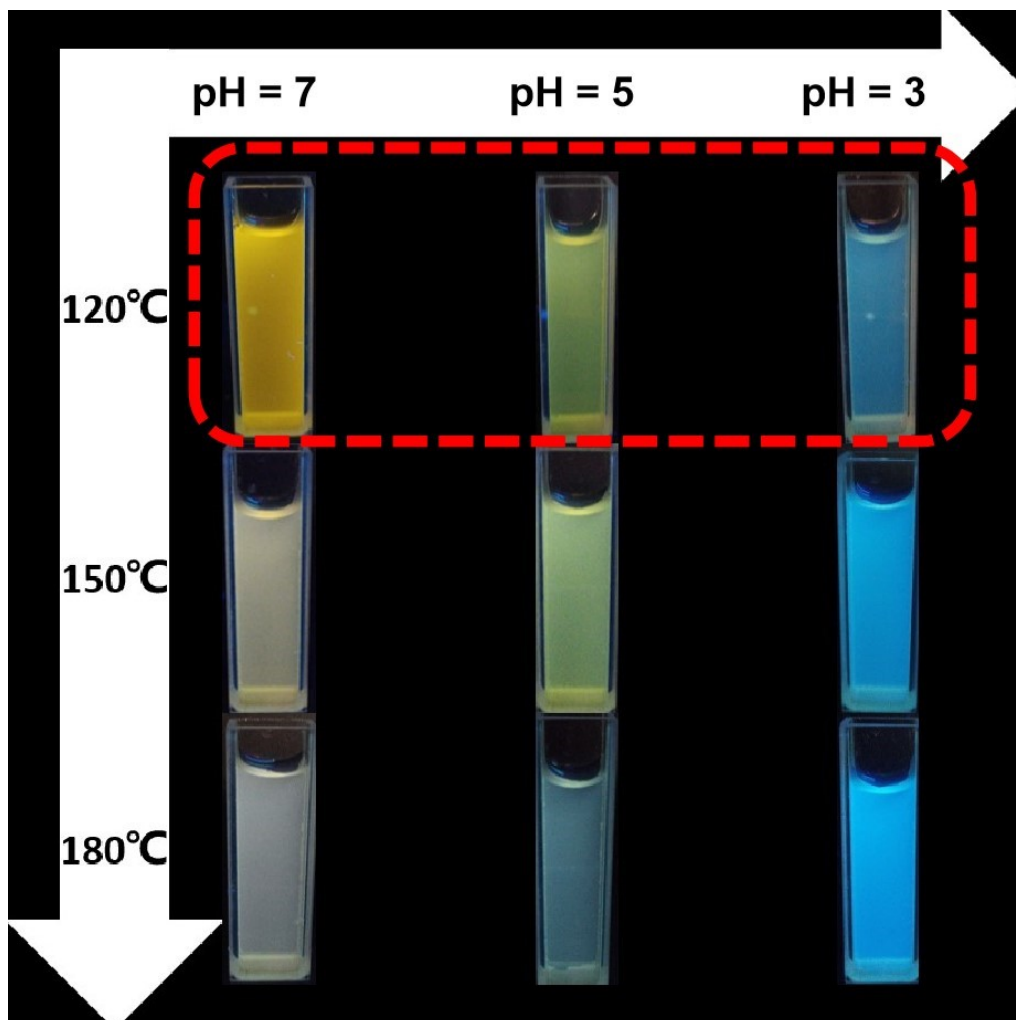

Figure S2 The fluorescent properties of CDs prepared at different conditions
